# Supplementary material for: Enzymatic decontamination of paraoxon-ethyl limits long-term effects in planarians
Source: PubMed Central journal article supplement (PMC7052158; doi:10.1038/s41598-020-60846-1), 2020-03-02
Supplement: 41598_2020_60846_MOESM1_ESM.pdf [file 41598_2020_60846_MOESM1_ESM.pdf]

2 **Enzymatic decontamination of paraoxon-ethyl**  
3 **limits long-term effects in planarians**

4 Laetitia Poirier<sup>1</sup>, Laure Plener<sup>2</sup>, David Daudé<sup>2,°</sup>, Eric Chabrière<sup>1,°</sup>

5 <sup>1</sup> Aix Marseille Université, IRD, APHM, MEPHI, IHU-Méditerranée Infection, Marseille,  
6 France,

7 <sup>2</sup> Gene&GreenTK, 19-21 Boulevard Jean Moulin, 13005 Marseille, France.

8 <sup>°</sup> Corresponding authors

9  
10

11 **Supplementary table 1.** Multiple sequence alignment of planarian cholinesterases (Smed\_4101, Smed\_4800, Smed\_10334,  
 12 Smed\_14790 and Smed\_15930) with acetylcholinesterase isoform E4-E5 precursor (NP\_056646.1) and butyrylcholinesterase  
 13 precursor (NP\_000046.1) using Clustal 2.1. Catalytic triad is indicated in red.

| Identity (%) | NP_000046.1 | NP_056646.1 | Smed_4101 | Smed_4800 | Smed_10334 | Smed_14790 | Smed_15930 |
|--------------|-------------|-------------|-----------|-----------|------------|------------|------------|
| NP_000046.1  | -           | 46.0133     | 27.3743   | 25.7475   | 22.4252    | 23.588     | 23.588     |
| NP_056646.1  |             | -           | 23.2775   | 23.825    | 23.1767    | 23.6629    | 24.9595    |
| Smed_4101    |             |             | -         | 25.5121   | 22.5326    | 24.0223    | 21.9739    |
| Smed_4800    |             |             |           | -         | 29.5238    | 37.8086    | 29.7297    |
| Smed_10334   |             |             |           |           | -          | 24.6032    | 26.6667    |
| Smed_14790   |             |             |           |           |            | -          | 28.3951    |
| Smed_15930   |             |             |           |           |            |            | -          |

14

15 **CLUSTAL 2.1 multiple sequence alignment**

```

16 Smed_4800      MKRFRRQVMVFKGSLLI I K L F I Y R I I Y I N S I S G E T F K K S I L I K E K R Y E L L G L T L N I Y - G K
17 Smed_14790    -----MRVEFEASSLIVLCFCLSYDAIVVH----- I K I D N Q T F P L K G K S I F K M - G K
18 NP_000046.1   -----MHSKVTIICIRFLWFLLLCMLIGKSHTEDDII I A T K N G K V R G M N L T V F - G G
19 NP_056646.1   -MRPPQCLLHTPSLASPLLLLLLWLLGGVGAEGREDAELLVTVRGGRLRGIRLKTP-GG
20 Smed_15930    -----MEFWSYSLWIFVWVTRGLTFNRNGEYVTVSTTNGNIMGIKKDVL-GK
21 Smed_10334    -----MEFVSFIVLLTAYSAVSYPI T P N Y T P S V R T K I G T I N G F I S K V E W N D R S A T
22 Smed_4101     -----MLNFSVSNGLVQGGQTRKVLHR
23
24
25 Smed_4800      T I D H F A R I P Y A L P P I N N L R F K Y P Q E I V G N Q W K G V Y N A T T S P N T C W Q V E - G G E F D K L N P A A
26 Smed_14790    K I F H F S K I P Y A K P P I G N R R F R Y P E K L N N P P W T G V Y D S T V Q P L T C W Q G A P S I E F E L K N P I G
27 NP_000046.1   T V T A F L G I P Y A Q P P L G R L R F K K P Q S L -- T K W S D I W N A T K Y A N S C C Q N I D Q S F P G F H G -- S
28 NP_056646.1   P V S A F L G I P F A E P P M G P R R F L P P E P K -- Q P W S G V V D A T T F Q S V C Y Q Y V D T L Y P G F E G -- T
29 Smed_15930    P V Y V F L G I P Y A K P P V G R L R F R N P E L V N -- K W E G T Y S A T K L P K T C Y Q N L P E H Y E L N N P - A W
30 Smed_10334    T V H I Y Y G I P Y A I P P V K N L R F K K P V P F P - E I S E K V V N A Q T H K P S C H Q Y N D T S Y L N T A G -- A
31 Smed_4101     D I A E F L S I P Y C K P P I G E L R F Q K P P F S -- S F S K S I I N R G K F D T C P P Q L P M R I F N G E N L D E
32
33
34 Smed_4800      R L W L S K T P M S E D C L Y L T I W S P R T ----- V K T K L P V M V W I Y G G S F F G S S T L E V Y
35 Smed_14790    K M W F S K T V M S E D C L Y L T I W T P Q I N V ----- A N E L L P V M I W I Y G G S Y M S G S S T L E V Y
36 NP_000046.1   E M W N P N T D L S E D C L Y L N V W I P A P K ----- P K N - A T V L I W I Y G G G F Q T G T S S L H V Y
37 NP_056646.1   E M W N P N R E L S E D C L Y L N V W T P Y P R ----- P T S P T P V L V W I Y G G G F Y S G A S S L D V Y
38 Smed_15930    R I W T N N T E M S E D C L Y L S I W T P K I N K N Q N R K M - F N E K F I I S T L V W I H G G G F T G G S S T L D I Y
39 Smed_10334    R M W V S P I P F D E D C L Y L N I W V P Q N P A P D V H K M N Q K T T D K L A V M V W I Y G G S F A S G A A G L E V Y
40 Smed_4101     E T W I P K E R Q D E N S L Y V N V W C P L E I L K ----- E K E N Q P V L V W I Y G G G Y V S G S S S L E I Y
41
42
43 Smed_4800      D G S I L A A K H E V V V S L Q Y R L G P L G F L Y L D D T L - A P G N Q G L M D Q R M A L K W V K D N I Y N F N G D
44 Smed_14790    D G S I L A S L H N V V I V S F Q F R S G P L G F L Y L D D T E - S P G N Q A I M D Q H M L L K W V N N H I V S F G G D
45 NP_000046.1   D G K F L A R V E R V I V S M N Y R V G A L G F L A L P G N P E A P G N M G L F D Q Q L A L Q W V Q N I A A F G G N
46 NP_056646.1   D G R F L V Q A E R T V L V S M N Y R V G A F G F L A L P G S R E A P G N V G L L D Q R L A L Q W V Q E N V A A F G G D
47 Smed_15930    N G E I L A S K M N V I V V N I Q Y R L G P F G F L S Y - N V K E I P G N Q G L M D Q V L A L Q W I R D N I G F F G G D
48 Smed_10334    E G R Y L A A R Q N V I V S M N Y R L G P F G F I Y L K N G L - I P G N M G L W D Q R L A L K W V K E N I E F F G G D
49 Smed_4101     D G S V L A S K E N I V V S F N Y R I A M L G F I S L D D E I - L N G N L G I W D Q V C A L Q W I H E N I S H F K G N
50
51
52 Smed_4800      S E S I T I F G E S A G S V G V S I H V L S P L S N N L F K R A I M E S A T A S A A W A I E T K K E S K E K G L A I S K
53 Smed_14790    P K K V T L F G E S S G A T S I S V H L F S K I S E K Y F Q R A I L Q S G T I F V P W A I E S S S A S Y I K A K Y L A E
54 NP_000046.1   P K S V T L F G E S A G A A S V S L H L L S P G S H S L F T R A I L Q S G S F N A P W A V T S L Y E A R N R T L N L A K
55 NP_056646.1   P T S V T L F G E S A G A A S V G M H L L S P P S R G L F H R A V L Q S G A P N G P W A T V G M G E A R R R A T Q L A H
56 Smed_15930    S K L V T I F G A N S G A V S A S F H L L S P L T Q D L F N Q A I M Q S G S A L S W W A Y D D P K T A I S K A Y H F A N
57 Smed_10334    S D K I T I F G E S A G S V S A H V I S P W S Q N L F R N A I M Q S G S V L G Y W G L I S R N T S E E R T K I L M N
58 Smed_4101     P K N V T I V G N S A G G S V S L H L L I E K S W E Y F Q N A I M L S G V C L S D W G F L T K N E V R D R S K K A V N
59
60
61 Smed_4800      F V N C N Y D S ---- W Q V N V L L K C L Q K V K P D L L V S K Q L D L K N I V N K Q R S D L L R R R G V K N L F T D
62 Smed_14790    K A N C T S R N ---- N Q E -- I V K C L R S T K P E V L V N L N F L I R D Q I A K T R K E K L M K E G Y K D F Y S D
63 NP_000046.1   L T G C S R E ---- N E T E I I K L R N K D P Q E I L L N E A F V V P Y G T -----

```

```

64 NP_056646.1 LVGCPPGGT--GGNDELVA CLRTRPAQVLVNHHEWHVLPQES-----
65 Smed_15930 LSGCHNSKETVEIKTSDLFECLRSLDPITLVVNQWKMLNERYR-----EKLTKPILPY
66 Smed_10334 RLKCRGSLH-----AKVECLRQLPAKQLTDAHSYLYDANS-----
67 Smed_4101 KILEKFD FPMKWNEEITRENKIAIKFLQNI NFKEFLLDTELVTG-----
68
69
70 Smed_4800 ASFFFDIIFRPTYDANFINQPVNLLLNDSTFKPN-IELLMGYNANEGMFFLLYGLNKWLN
71 Smed_14790 AALFFDIYFRPIFDQKIISKLDVEKISEGQLVTN-KDLLIGTNANEAMFFLLMYGLSSNFK
72 NP_000046.1 ---PLSVNFGPTVDGDFLTDMPDILLELGQFKK--TQILVGVNKDEGTAFLVYGAPGFSK
73 NP_056646.1 ---VFRFSFVFPVVDGDFLSDTPEALINAGDFHG--LQVLVGVVKDEGSYFLVYGAPGFSK
74 Smed_15930 ASFYFDI PFKPTIGGLYLPKPPSSYFAGKEPKILRKRVM LGTTKNEGLIHLFKGFRHYFM
75 Smed_10334 ---YFSVFPFPVIDNHFLYPNSQAFKNLVHVKPTGALMLGMNKNEGSYFMLSFI PNSD
76 Smed_4101 ---ILQFAWAPCVDGELIKDDPRRLFNEKKFKICPTIFLN--VANEGTYFII SRFPNIDV
77
78
79 Smed_4800 FFNKGEVEDTSLSSNNTNYIKASKFLLLENLTPNDIAYTNLLPLLHEYKIPSTIFNWKK
80 Smed_14790 LFESSKIVLPSKMSYPSENYTDPYKIVLENILDLDYLYPSLTKLILHEYGIQSQHFDDKS
81 NP_000046.1 DNNS-----IITRKEFQEGKIFFPGVSEFGKESILFHYTDWVDD-
82 NP_056646.1 DNES-----LISRAEFLAGVRVGVPPQVSDLAEEAVVLHYTDWLHP-
83 Smed_15930 PSDDSLVQPALFRYG--PNTKDPADLLTHYIVNDK FVNHFNIEAIAFEYELPSKIFQSQN
84 Smed_10334 WLNNKTSVQIAN-----NKDYQEKL RKVLDLEAKIPSQILSLVDFEYTDYNLP-
85 Smed_4101 DNHK-----MIDNKYFTQTFFQYYPHFPIICSQSTRKKISVEYVL
86
87
88 Smed_4800 WNSTDVLSALDQLTGDQNFVCPVIDYAELLAD-----KNVKVYLYSFQHRTSR
89 Smed_14790 WTSKEILQKLDFIGGDMQFICPTIQFADSVTKS-----KSSKLFMYLFNCRTNG
90 NP_000046.1 QRPENYREALGDVVG DYNFICPALEFTKKFSE-----WGNNAFFYFEHRSSK
91 NP_056646.1 EDPARLREALSDVVG DHNVCVPAQLAGRLAA-----QGARVYAYVFEHRAST
92 Smed_15930 WKSQDIINVDNIAGDFSFKCPVVD FADKYLK-----IAQVYLYSFEQQTQF
93 Smed_10334 DTPQNRVNRLEEISSDRSFKCPTIEMAKMVNNDNRFEKGLGKR SVTLPTYFYEFYRTRTKS
94 Smed_4101 NEPSLSIDILDRIIADQYFISGSIELANLISKS-----NSKVYLYWFETFTQF
95
96
97 Smed_4800 MTFPKWTGTMHGYEIEYVFGMPF SKNFQNLFYFTTTEEAKLSNYIMTLWANFAKFGNPTT
98 Smed_14790 TEVPDWLGVMHGYEIEYVFGMPFSSDFTSNLYSFNDDKNSR SVMKFWTNFAKYGNPTP
99 NP_000046.1 LPWPEWMGVMHGYEIEFVFGFLPLERRD-----YTKAEEILSR SIVKRWANFAKYGNPN-
100 NP_056646.1 LSWPLWMGVPHG YEIEFIFGIPLDPSRN-----YTAEKIFAQRLMRYWANFARTGDPN-
101 Smed_15930 LPLPPWSGVLQGGQEIAYVFGKPFDMEFRKYYNFSEEMK LSEKIMS YWTNFAQTGQPNN
102 Smed_10334 LPWPEWMTIHGLEIDYVFGVFPFNKKFEKIFYEFTDEERRISDVVMQYWANFARHGDPNI
103 Smed_4101 EHWPNWCGVMHSEEIYYLFGHYLTQQSE-----TRQSATS IKIMKEFGNFVKHGNLSE
104
105
106 Smed_4800 -----QKIEYFDSTLSWPLYNTTSKLSVYFTT PHESQLNAARLNDKAMKCKFWNK
107 Smed_14790 -----TDFTEKG---FWPAYTNKNKRYLKI SG-TNSGGFKVENHFKQK HCRFWTK
108 NP_000046.1 -----ETQN-NSTSWPVFKSTEQKYLTLNT---ESTRIMTKLRAQQCRFWTS
109 NP_056646.1 -----EPRDPKAPQWPYPYTAGAQQYVSLDL---RPLEVRRGLRAQACAFWNR
110 Smed_15930 R-----MREYHTRTRGMHWD TYSGTNINGRKH LIFRN NRVLAGR N-FRRHECLFWRN
111 Smed_10334 MPNDKLVSDYDVSINGKPLRVWPEFDNTTQSYIIIKE---DGNLTTSVNPKR KCLFWRR
112 Smed_4101 VFR-----NYDESSNAYIKIN EDLWTS AIFSKDQINKVRFWEK
113
114
115 Smed_4800 VIPPILEKFKNFSPTLNKVAW TNIVIIIIINNTRLTTEEHNKICKNL-----
116 Smed_14790 ILPDLNRLLNKK---NGSSALLLVDSLLVSSVLKVLASFMALCFRSI-----
117 NP_000046.1 FFPKVLEMTG-----NIDEAEWEWKAGFHRWNNYMMDWKNQFNDYTSKKE SCVGL--
118 NP_056646.1 FLPKLLSATASEAPSTCPGFTHGEAAPRGLPLPLLLLHQLLLLFLSHLRLR-----
119 Smed_15930 YLPDMRKNILSNSKCNPRNTVQKPIVKNPTYTSIQNSSPLIDRPIAKSSKRNPND DKNN
120 Smed_10334 WYPILLKETKPKHINCSHRNRNAGLKR-----
121 Smed_4101 LRRKFYDNF-----
122
123
124 Smed_4800 -----
125 Smed_14790 -----
126 NP_000046.1 -----
127 NP_056646.1 -----
128 Smed_15930 KSTIIIGIENLLFISIIWIFQMLKYL F
129 Smed_10334 -----
130 Smed_4101 -----
131

```

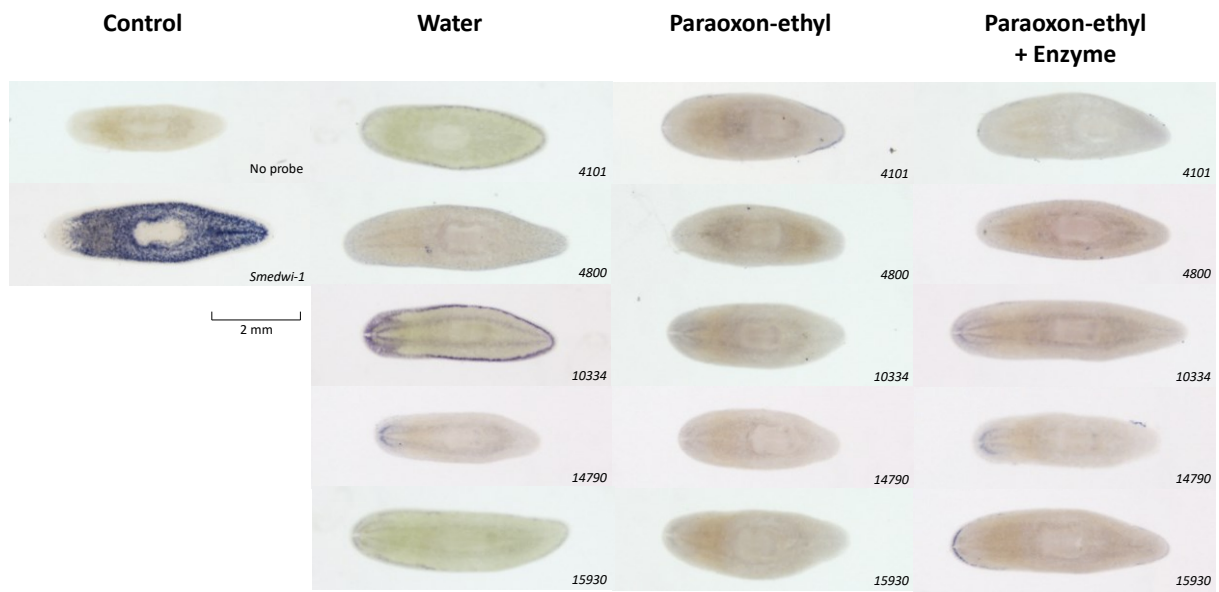

132

133 **Supplementary figure 1.** Localization of planarian cholinesterases by WISH (Whole-mount in situ hybridization). *Smedwi-1*  
 134 is a marker of proliferation cells. All cholinesterase numbers were retrieved from PlanMine database and specified in the  
 135 lower right corner in italics for each picture. Distinct nervous pattern systems were identified and impact of paraoxon-ethyl (5  
 136  $\mu\text{M}$ , 1/2 of NOEC) was determined. Scale bar represents 2 mm.  
 137

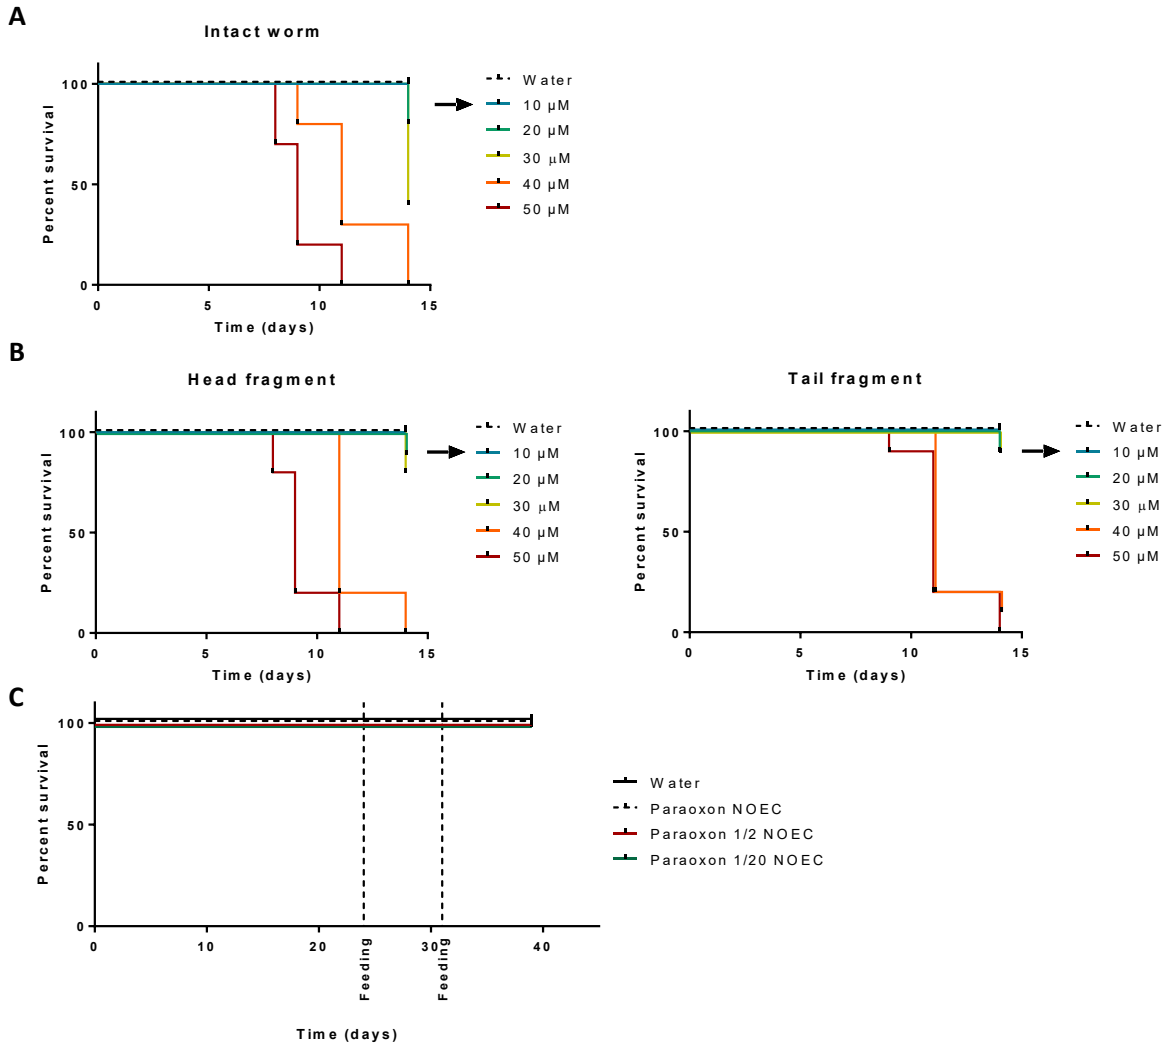

138

139 **Supplementary figure 2.** Survival rates of planarians. The toxicity of paraoxon-ethyl was evaluated for concentrations  
 140 ranging from 10 µM up to 50 µM for intact planarians (A) and after amputation on head and tail fragments (B). The curves  
 141 represent the survival rates for 10 planarians exposed to paraoxon-ethyl. Arrows indicate NOEC values. (C) As control  
 142 NOEC value of 10 µM was verified over 39 days on intact worms.  
 143

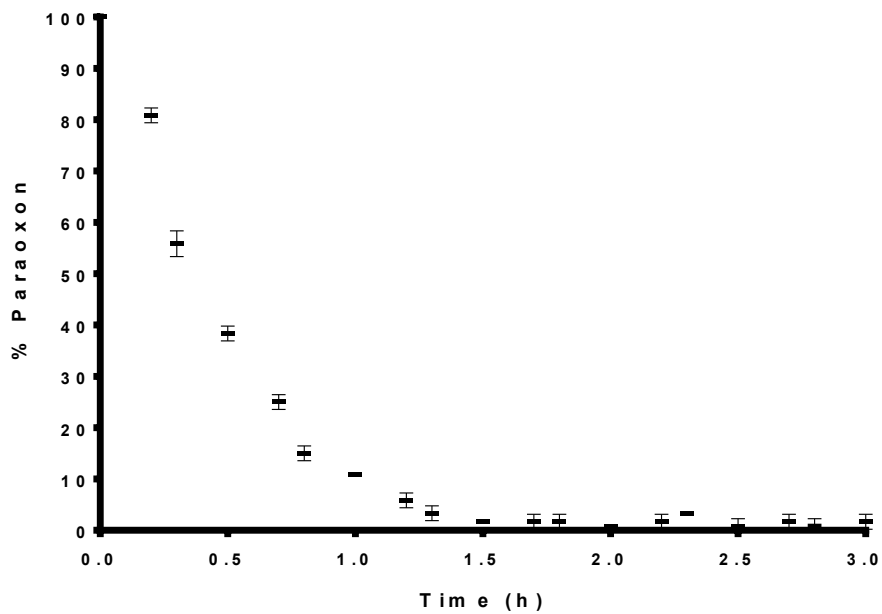

144

145 **Supplementary figure 3.** 5 $\mu$ M Paraoxon-ethyl degradation curve. The degradation of 5 $\mu$ M paraoxon-ethyl by the enzyme  
146 *SsoPox*  $\alpha$ sD6 at 0.25 $\mu$ M was followed over time. Full degradation was reached after 1.5h incubation.

147

148

149

150

151

152

153

154

155

156

| Head fragment (Posterior regeneration) |                          |                          |  |
|----------------------------------------|--------------------------|--------------------------|--|
|                                        | No regeneration          | Amputated part           |  |
|                                        | Blastema                 | Start of regeneration    |  |
|                                        | Regeneration in progress | Emergence of the pharynx |  |
|                                        | Regenerated              | Complete regeneration    |  |

157

158 **Supplementary figure 4.** Planarian posterior regeneration is presented using a color code from grey to green describing  
 159 initial to final regeneration stages.

160

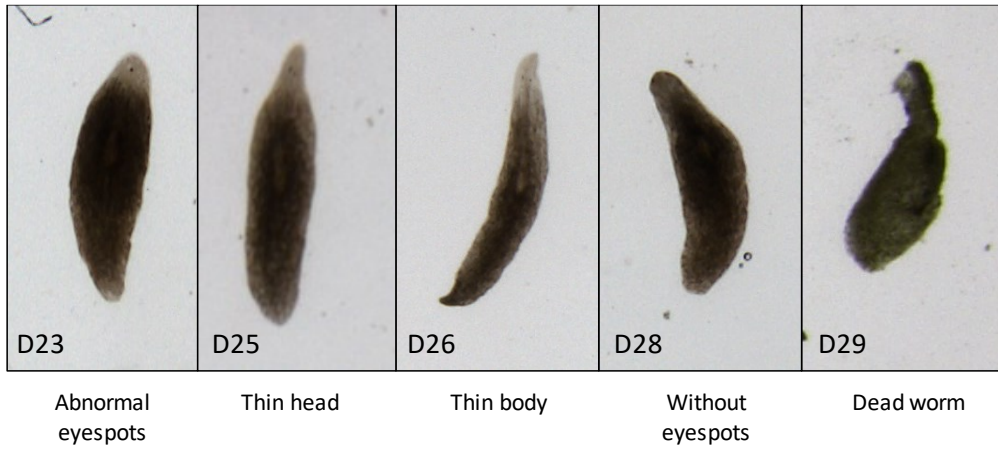

161

162  
163  
164

**Supplementary figure 5.** Temporal evolution of an abnormal worm exposed to paraoxon-ethyl 5  $\mu$ M. The worm arose from a G1 tail fragment.



165

166

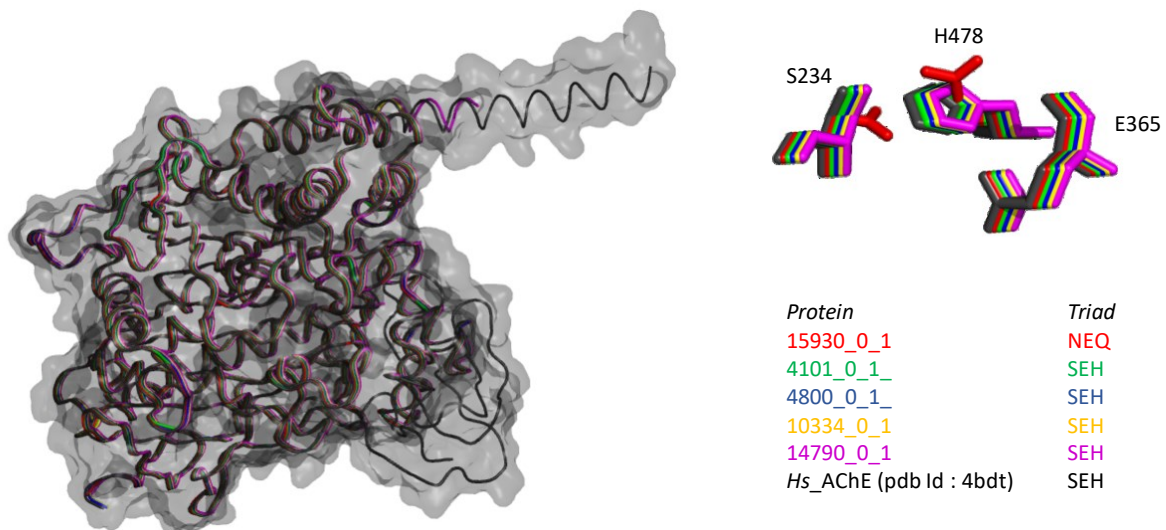

167

168 **Supplementary figure 6.** Structural predictions of planarian cholinesterases compared to the best template c4bdA\_  
169 corresponding to human acetylcholinesterase in complex with huprine w and fasciculin 2 (pdb : 4bdt). Conservation of the  
170 catalytic triad in all sequences, except dd\_Smed\_v6\_15930\_0\_1.  
171
